# Supplementary material for: Ishophloroglucin A, a Novel Phlorotannin for Standardizing the Anti-α-Glucosidase Activity of Ishige okamurae
Source: MDPI journal article supplement (doi:10.3390/md16110436), 2018-11-08
Supplement: s1 [file s1]

## Supplementary Materials

### Table of Contents

|                                                                                                             |   |
|-------------------------------------------------------------------------------------------------------------|---|
| Figure S1: MS spectra of DPHC (A, 512.06 g/mol) and Ishophloroglucin A (B, 1986.26 g/mol) in negative mode. | 2 |
| Figure S2. HMQC spectrum of Ishophloroglucin A in DMSO- <i>d</i> <sub>6</sub> .                             | 3 |
| Figure S3. HMBC spectrum of Ishophloroglucin A in DMSO- <i>d</i> <sub>6</sub> .                             | 4 |

(A)

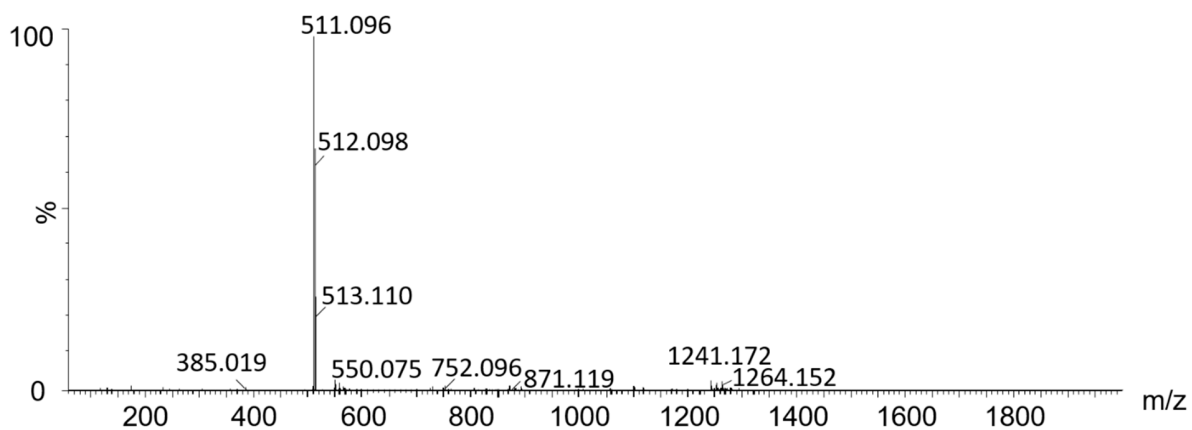

(B)

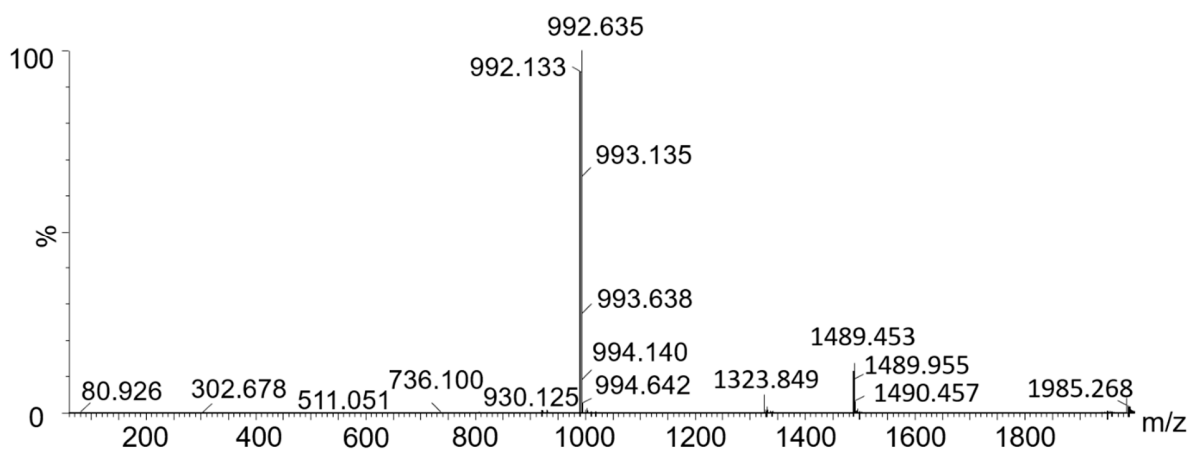

Figure S1. MS spectra of DPHC (A, 512.06 g/mol) and Ishophloroglucin A (B, 1986.26 g/mol) in negative mode.

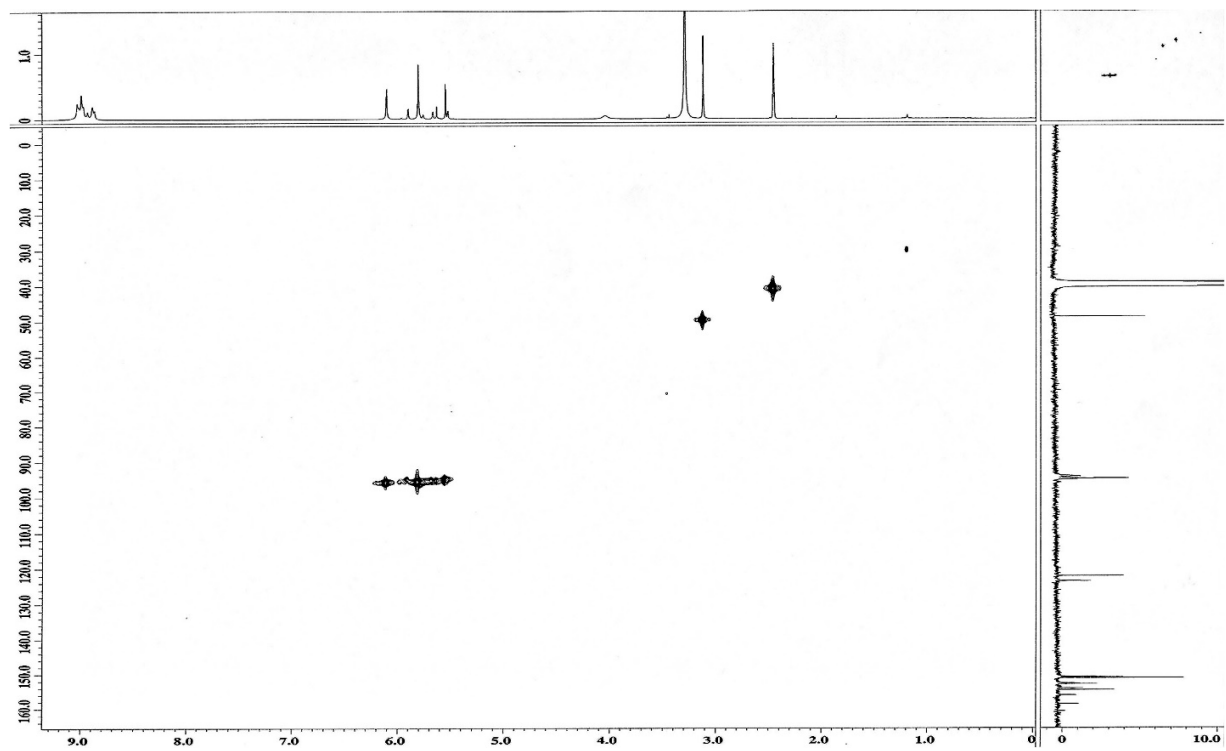

Figure S2. HMQC spectrum of Ishphloroglucin A in DMSO-*d*<sub>6</sub>.

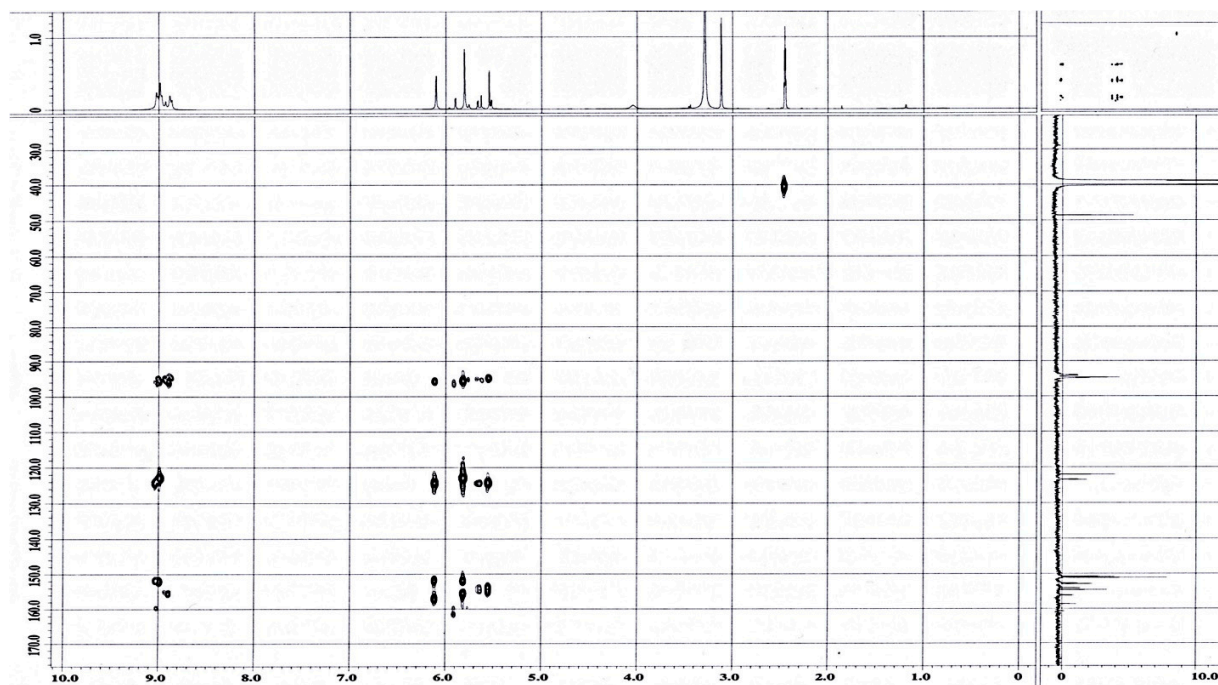

Figure S3. HMBC spectrum of Ishphloroglucin A in DMSO- $d_6$ .
